# Supplementary material for: More Power to OATP1B1: An Evaluation of Sample Size in Pharmacogenetic Studies Using a Rosuvastatin PBPK Model for Intestinal, Hepatic, and Renal Transporter‐Mediated Clearances
Source: PubMed Central journal article supplement — J Clin Pharmacol. 2016 Jul 7;56(Suppl Suppl 7):S132–42. doi: 10.1002/jcph.669 (PMC5096019; doi:10.1002/jcph.669), 2016-07-07
Supplement: JCPH-56-S132-s001.pdf [file JCPH-56-S132-s001.pdf]

## **Supplementary Material**

### **More power to OATP1B1: An evaluation of sample size in pharmacogenetic studies using a rosuvastatin PBPK model for intestinal, hepatic and renal transporter-mediated clearances**

Ariane Emami Riedmaier, Howard Burt, Khaled Abduljalil and Sibylle Neuhoff

Pages 2-3: Supplementary Methods

Pages 4-8: Supplementary Tables

Pages 9-19: Supplementary Figures

Pages 20-21: References

## Supplementary Methods – Power calculation

Power calculations within the Simcyp Simulator are performed as a post-simulation calculation assuming a parallel study design to compare different populations. The methodology used for a given sample size was based on that defined by Armitage et al. (2002)<sup>1</sup> with the user defining the number of subject per population (N), significance level, and the parameter of interest.

First, the parameter of interest and the populations were defined.  $X_{pop1}$  was defined as the parameter of interest (e.g. AUC) for extensive transporters (population 1) and  $x_{pop2}$  was defined as the AUC parameter for poor transporters (population 2). Note  $x_{pop1}$  and  $x_{pop2}$  are always the same parameter. It is assumed that  $x_{pop1}$  and  $x_{pop2}$  have the following normal distributions:

$$x_{pop1} \sim N(\mu_1, \sigma_1^2) \text{ and } x_{pop2} \sim N(\mu_2, \sigma_2^2)$$

Where  $\mu_1$  and  $\sigma_1^2$  are the mean and variance of population 1, and  $\mu_2$  and  $\sigma_2^2$  are the mean and variance for population 2.

To determine the mean and variance of each population, a simulation is first run for each population using the population size entered by the user on screen. The mean and variance is then calculated for the selected parameters using the simulation result. By central limit theorem, if a sample of size  $n_1$  is selected from population 1 and a sample of size  $n_2$  is selected from population 2 then the sample means,  $\bar{x}_{pop1}$  and  $\bar{x}_{pop2}$ , have the following normal distributions:

$$\bar{x}_{pop1} \sim N\left(\mu_1, \frac{\sigma_1^2}{n_1}\right) \text{ and } \bar{x}_{pop2} \sim N\left(\mu_2, \frac{\sigma_2^2}{n_2}\right).$$

To calculate the power, the null hypothesis that population 2 is equal to population 1 was tested, (i.e. population 2 has the same mean and variance as population 1). To calculate the power to detect a difference in this test, the critical value is first calculated for population 1 at the significance level specified on screen. This is derived by calculating the following probability (for  $\alpha$  significance level) depending on whether  $\mu_2 > \mu_1$  or  $\mu_2 < \mu_1$  as follows:

- 1) If  $\mu_2 > \mu_1$  then the probability that an observed value of the random variable  $\bar{X}_{pop1}$  is less than the critical value (c) for significance level  $\alpha$  is defined as:

$$P(\bar{X} < c) = 1 - \alpha = P\left(Z < \frac{c - \mu_1}{\frac{\sigma_1}{\sqrt{n_1}}}\right) \text{ where } Z \sim N(0,1)$$

$$\text{Therefore } c = \left(\Phi^{-1}(1 - \alpha) * \frac{\sigma_1}{\sqrt{n_1}}\right) + \mu_1$$

where  $\Phi$  is the standard normal cumulative distribution function.

The power of the study is then calculated for each sample size specified for population 2 by calculating the probability of  $\bar{X}_{pop1}$  being greater than the critical value:

$$P(\bar{X}_{pop2} > c) \text{ where } \bar{X}_{pop2} \sim N\left(\mu_2, \frac{\sigma_2^2}{n_2}\right).$$

This is equivalent to calculating:  $P\left(Z > \frac{c - \mu_2}{\frac{\sigma_2}{\sqrt{n_2}}}\right) = 1 - P\left(Z < \frac{c - \mu_2}{\frac{\sigma_2}{\sqrt{n_2}}}\right)$  where  $Z \sim N(0,1)$

- 2) If  $\mu_2 < \mu_1$  then the probability that an observed value of the random variable  $\bar{X}_{pop1}$  is less than the critical value c for significance level  $\alpha$  is

$$P(\bar{X}_{pop1} < c) = \alpha = P\left(Z < \frac{c - \mu_1}{\frac{\sigma_1}{\sqrt{n_1}}}\right) \text{ where } Z \sim N(0,1),$$

$$\text{therefore } c = \left(\Phi^{-1}(\alpha) * \frac{\sigma_1}{\sqrt{n_1}}\right) + \mu_1.$$

The power of the study is then calculated for each sample size specified for population 2 by calculating the probability of  $\bar{X}_{pop2}$  being greater than the critical value:

$$P(\bar{X}_{pop2} < c) \text{ where } \bar{X}_{pop2} \sim N\left(\mu_2, \frac{\sigma_2^2}{n_2}\right).$$

This is equivalent to calculating  $P\left(Z < \frac{c - \mu_2}{\frac{\sigma_2}{\sqrt{n_2}}}\right)$  where  $Z \sim N(0,1)$ .

Supplementary Table S1 – Parameter Values Used for the Rosuvastatin Simulations.

| Parameter                                                                        | Value           | Reference/Comments                                    |
|----------------------------------------------------------------------------------|-----------------|-------------------------------------------------------|
| Molecular Weight (g/mol)                                                         | 481.54          |                                                       |
| $f_u$ – experimental                                                             | 0.107           | 2, 3                                                  |
| Blood-to-plasma ratio ( $B:P$ ) – experimental                                   | 0.625           | 2, 3                                                  |
| Log of the octanol:water partition coefficient ( $\log P_{o:w}$ ) – experimental | 2.4             | 4                                                     |
| Compound type                                                                    | Monoprotic Acid | Marvin Sketch 5.4.0.1 <sup>5</sup>                    |
| pKa                                                                              | 4.27            | 3                                                     |
| Main plasma binding protein                                                      | HSA             | Rosuvastatin Astrazeneca Full Prescribing Information |
| <b>Absorption</b>                                                                | ADAM            |                                                       |
| Model                                                                            |                 |                                                       |
| Caco-2 permeability ( $P_{app,caco-2(7.4:7.4)}$ [ $10^{-6}$ cm/s])               | 3.395           | 6                                                     |
| Reference compound                                                               | Propranolol     |                                                       |
| Reference $P_{app,caco-2(7.4:7.4)}$ [ $10^{-6}$ cm/s]                            | 20              | 6                                                     |
| $f_a$ – predicted                                                                | 0.66            | Based on Caco-2 data                                  |
| $f_a$ – observed                                                                 | 0.55            | 2                                                     |
| $k_a$ ( $h^{-1}$ ) – predicted                                                   | 0.35            | Based on Caco-2 data                                  |
| $k_a$ ( $h^{-1}$ ) – observed                                                    | 0.46 – 0.78     | Range: <sup>7,8</sup>                                 |
| <b>Distribution</b>                                                              |                 |                                                       |
| Model                                                                            | Full PBPK       |                                                       |
| $V_{ss}$ (L/kg) – predicted                                                      | 0.117           | Rodgers and Rowland method; see text for details      |
| $V_{ss}$ (L/kg) – observed                                                       | 1.73            | 2                                                     |
| <b>Elimination</b>                                                               |                 |                                                       |
| $CL_{iv}$ (L/h)                                                                  | 48.78           | 2                                                     |
| $CL_{int}$ ( $\mu$ L/min/mg protein)                                             | 17              | Calculated using the Retrograde model                 |
| $CL_R$ (L/h)                                                                     | 17              | Meta-analysis <sup>2,9,10</sup>                       |
| <b>Transport (active and passive)</b>                                            |                 |                                                       |
| Intestinal efflux                                                                |                 |                                                       |
| $CL_{int,T,BCRP}$ ( $\mu$ L/min/cm <sup>2</sup> )                                | 35              |                                                       |
| Intestinal BCRP REF (User)                                                       | 1               |                                                       |
| Hepatic Uptake and Efflux Intrinsic Clearance                                    |                 |                                                       |
| $CL_{int,T,OATP1B1}$ ( $\mu$ L/min/million hepatocytes)                          | 109             | See text for details; <sup>11</sup>                   |
| Hepatic OATP1B1 REF (User)                                                       | 1               |                                                       |
| $CL_{int,T,OATP1B3}$ ( $\mu$ L/min/million hepatocytes)                          | 36              | See text for details; <sup>11</sup>                   |
| Hepatic OATP1B3 REF (User)                                                       | 1               |                                                       |
| $CL_{int,T,NTCP}$ ( $\mu$ L/min/million hepatocytes)                             | 78              | See text for details; <sup>11,12</sup>                |
| Hepatic NTCP REF (User)                                                          | 1               |                                                       |
| $CL_{int,T,BCRP}$ ( $\mu$ L/min/million hepatocytes)                             | 1.23            | 13                                                    |
| Hepatic BCRP REF (User)                                                          | 1               |                                                       |
| $CL_{bile}$ (L/h) - predicted                                                    | 15              | Using above data                                      |

**More power to OATP1B1: An evaluation of sample size in pharmacogenetic studies using a rosuvastatin PBPK model for intestinal, hepatic and renal transporter-mediated clearances**

Ariane Emami Riedmaier, Howard Burt, Khaled Abduljalil and Sibylle Neuhoff

|                                                              |         |                                                     |
|--------------------------------------------------------------|---------|-----------------------------------------------------|
| CL <sub>bile</sub> (L/h) – observed                          | 4 - 195 | 14, 15                                              |
| Passive intrinsic clearance at sinusoidal membrane           |         |                                                     |
| CL <sub>int,PD</sub> (ml/min/million hepatocytes)            | 0.0025  | 16                                                  |
| Renal Uptake and Efflux Intrinsic Clearance                  |         |                                                     |
| CL <sub>int, T, BCRP</sub> (μL/min/cm <sup>2</sup> )         | 1100    | Based on Sensitivity Analysis; See text for details |
| Renal BCRP REF (User)                                        | 1       |                                                     |
| CL <sub>int,T,OAT3</sub> (μL/min/cm <sup>2</sup> )           | 1100    | Based on Sensitivity Analysis; See text for details |
| Renal OAT3 REF (User)                                        | 1       |                                                     |
| Passive Intrinsic Clearance at Basal Membrane                |         |                                                     |
| CL <sub>int,PD</sub> (ml/min/ million proximal tubule cells) | 0.0984  | See text for details; <sup>17</sup>                 |
| Passive Intrinsic Clearance at Apical Membrane               |         |                                                     |
| CL <sub>int,PD</sub> (ml/min/million proximal tubule cells)  | 0.0984  | See text for details; <sup>17</sup>                 |

Supplementary Table S2 – Details of the single-dose clinical studies used for performance verification of the rosuvastatin PBPK model, corresponding to supplementary figures S1-S11.

| <b>Study Number</b> | <b>Rosuvastatin Dose (mg)</b> | <b>Age-range (years)</b> | <b>Subject Number</b> | <b>Proportion of Females</b> | <b>Study Duration (hrs)</b> | <b>References</b> |
|---------------------|-------------------------------|--------------------------|-----------------------|------------------------------|-----------------------------|-------------------|
| 1                   | 10                            | 22-42                    | 11                    | 0                            | 30                          | 18                |
| 2                   | 10                            | 31-60                    | 18                    | 0                            | 72                          | 19                |
| 3                   | 20                            | 31-60                    | 9                     | 0                            | 72                          | 19                |
| 4                   | 40                            | 21-39                    | 36                    | 0.139                        | 96                          | 20                |
| 5                   | 40                            | 31-60                    | 9                     | 0                            | 72                          | 19                |
| 6                   | 40                            | 21-51                    | 10                    | 0                            | 96                          | 2                 |
| 7                   | 80                            | 29-51                    | 14                    | 0                            | 72                          | 21                |
| 8                   | 80                            | 22-44                    | 11                    | 0                            | 72                          | 22                |
| 9                   | 80                            | 25-56                    | 14                    | 0                            | 100                         | 18                |
| 10                  | 80                            | 31-60                    | 18                    | 0                            | 72                          | 19                |
| 11                  | 80                            | 35-47                    | 20                    | 0.15                         | 30                          | 8                 |

Supplementary Table S3 – Mean predicted versus observed  $AUC_{0-48}$ ,  $C_{max}$  and  $T_{max}$  following oral administration of rosuvastatin at 10, 20, 40 and 80 mg doses. Comparisons were made with observed data from 11 independent clinical studies in healthy volunteers.

| Study Number | References                                                            | $AUC_{0-48}$ (ng.h/mL) |           |             | $C_{max}$ (ng/mL) |           |             | $T_{max}$ (hr) |           |             |
|--------------|-----------------------------------------------------------------------|------------------------|-----------|-------------|-------------------|-----------|-------------|----------------|-----------|-------------|
|              |                                                                       | Observed               | Predicted | Fold        | Observed          | Predicted | Fold        | Observed       | Predicted | Fold        |
| 1            | Cooper <i>et al.</i> 2003. CPT, 73 (4): 322-329 (10 mg) <sup>18</sup> | 51.2                   | 39.3      | <b>0.77</b> | 5.8               | 4.19      | <b>0.72</b> | 5              | 3.68      | <b>0.74</b> |
| 2            | Martin <i>et al.</i> 2003. CT, 25(8): 2215-2224 (10 mg) <sup>19</sup> | 31.6                   | 40.7      | <b>1.29</b> | 3.75              | 4.35      | <b>1.16</b> | 5              | 3.70      | <b>0.74</b> |
| 3            | Martin <i>et al.</i> 2003. CT, 25(8): 2215-2224 (20 mg) <sup>19</sup> | 56.8                   | 86.47     | <b>1.52</b> | 6.79              | 8.86      | <b>1.30</b> | 5              | 3.72      | <b>0.74</b> |
| 4            | Lee <i>et al.</i> 2005. CPT, 78: 330-341 (40 mg) <sup>20</sup>        | 216                    | 160.5     | <b>0.74</b> | 25                | 17.28     | <b>0.69</b> | 4.14           | 3.58      | <b>0.87</b> |
| 5            | Martin <i>et al.</i> 2003. CT, 25(8): 2215-2224 (40 mg) <sup>19</sup> | 98.2                   | 166.9     | <b>1.70</b> | 10.3              | 17.72     | <b>1.72</b> | 5              | 3.72      | <b>0.74</b> |
| 6            | Martin <i>et al.</i> 2003. CT, 25(10): 2553-2563 (40 mg) <sup>2</sup> | 165                    | 162.8     | <b>0.99</b> | 18.8              | 17.45     | <b>0.93</b> | 5              | 3.75      | <b>0.75</b> |
| 7            | Cooper <i>et al.</i> 2002. EJCP, 58: 527-531 (80 mg) <sup>21</sup>    | 325                    | 335       | <b>1.03</b> | 41.4              | 35.06     | <b>0.85</b> | 5              | 4         | <b>0.80</b> |
| 8            | Cooper <i>et al.</i> 2003. EJCP, 59: 51-56 (80 mg) <sup>22</sup>      | 253                    | 320.4     | <b>1.27</b> | 33.7              | 34.1      | <b>1.01</b> | 4              | 3.68      | <b>0.92</b> |
| 9            | Cooper <i>et al.</i> 2003. CPT, 73 (4): 322-329 (80 mg) <sup>18</sup> | 443                    | 310.6     | <b>0.70</b> | 53.5              | 33.2      | <b>0.62</b> | 3              | 3.64      | <b>1.21</b> |
| 10           | Martin <i>et al.</i> 2003. CT, 25(8): 2215-2224 (80 mg) <sup>19</sup> | 268                    | 325.9     | <b>1.22</b> | 30.1              | 34.77     | <b>1.16</b> | 5              | 3.70      | <b>0.74</b> |
| 11           | Schneck <i>et al.</i> 2004. CPT, 75: 455-463 (80 mg) <sup>8</sup>     | 410                    | 352.57    | <b>0.86</b> | 49.5              | 38.06     | <b>0.77</b> | 4              | 3.69      | <b>0.92</b> |

Supplementary Table S4 – Comparison of predicted and observed pharmacokinetic parameters for rosuvastatin depending on OATP phenotype. The observed values are derived from Pasanen *et al.* 2007<sup>7</sup>. AUC and  $C_{\max}$  values are reported as mean  $\pm$  standard deviation.  $T_{\max}$  is reported as median  $\pm$  standard deviation.

| OATP1B1 Phenotype        | $C_{\max}$ (ng/ml) |                 | $T_{\max}$ (h) |               | AUC <sub>0-48h</sub> (ng/ml.h) |                 |
|--------------------------|--------------------|-----------------|----------------|---------------|--------------------------------|-----------------|
|                          | Predicted          | Observed        | Predicted      | Observed      | Predicted                      | Observed        |
| Extensive Transporter    | 4.0 $\pm$ 2.41     | 4.21 $\pm$ 2.41 | 3.8 $\pm$ 1.89 | 5.0 (1.0-5.0) | 39.3 $\pm$ 23.0                | 33.7 $\pm$ 17.5 |
| Intermediate Transporter | 5.0 $\pm$ 2.81     | 6.38 $\pm$ 3.20 | 3.6 $\pm$ 1.95 | 4.0 (2.0-5.0) | 47.0 $\pm$ 25.3                | 53.1 $\pm$ 22.3 |
| Poor Transporter         | 5.6 $\pm$ 4.33     | 7.53 $\pm$ 1.20 | 3.4 $\pm$ 2.36 | 5.0 (3.0-5.0) | 51.5 $\pm$ 37.6                | 55.6 $\pm$ 5.4  |



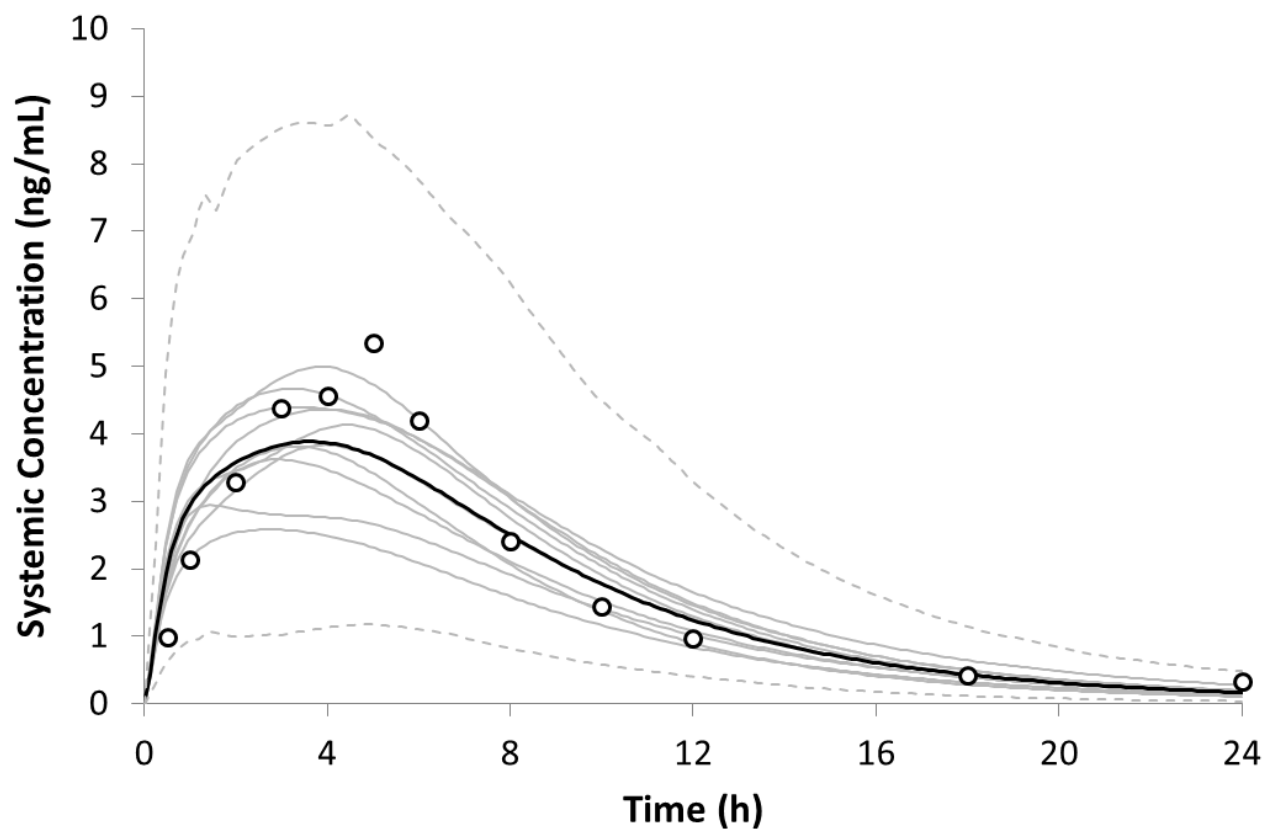

**Figure S1** – Simulated plasma concentration-time profiles of rosuvastatin in healthy volunteers following oral administration of 10 mg. The grey thin lines represent simulated individual trials (10) of 11 male subjects (22-42 years) and the solid black line represents the simulated mean of the healthy volunteers population (n=110). The dashed lines represent the upper (5<sup>th</sup>) and lower (95<sup>th</sup>) percentiles of simulated concentrations in the total population (n=110 subjects). The circles denote mean values from the clinical study by Cooper *et al.* 2003a<sup>18</sup>.

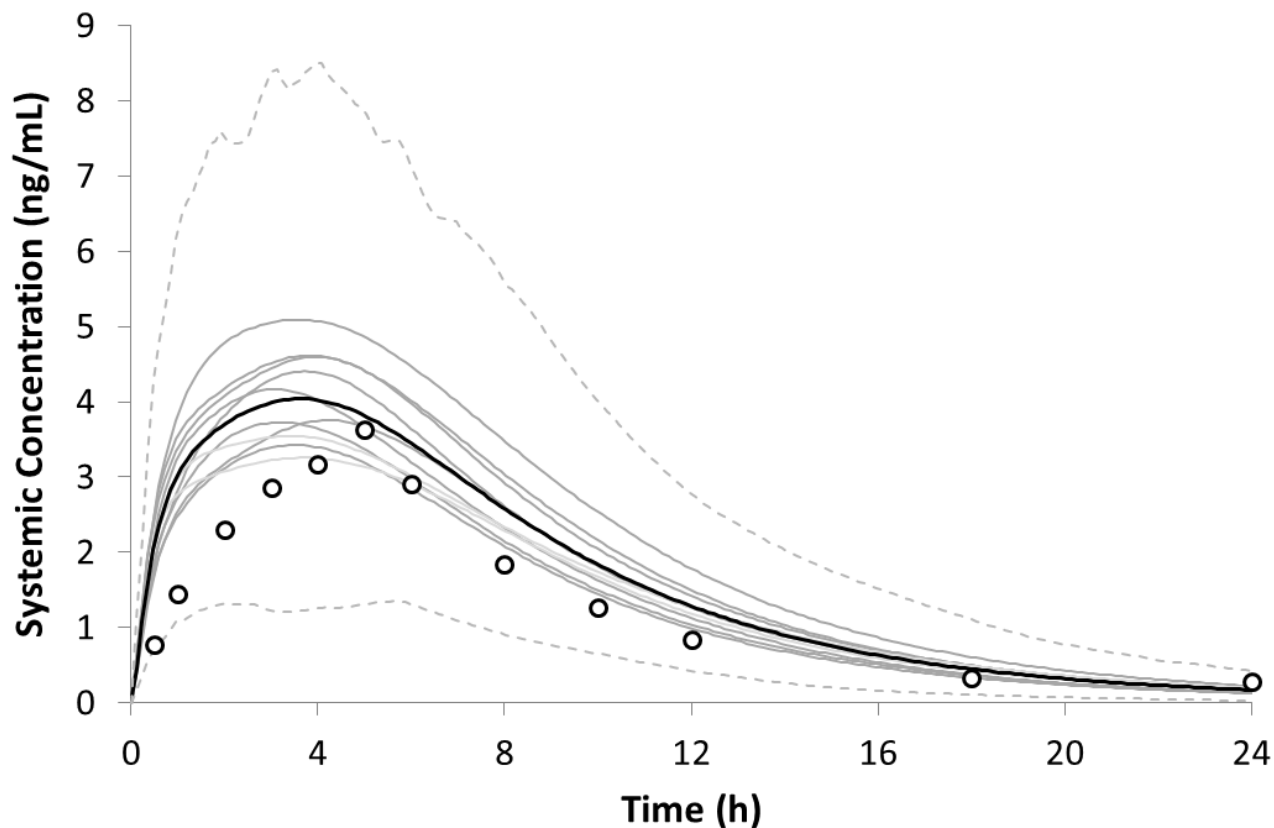

**Figure S2** – Simulated plasma concentration-time profiles of rosuvastatin in healthy volunteers following oral administration of 10 mg. The grey thin lines represent simulated individual trials (10) of 18 male subjects (31-60 years) and the solid black line represents the simulated mean of the healthy volunteers population (n=180). The dashed lines represent the upper (5<sup>th</sup>) and lower (95<sup>th</sup>) percentiles of simulated concentrations in the total population (n=180 subjects). The circles denote mean values from the clinical study by Martin *et al.* 2003a<sup>19</sup>.

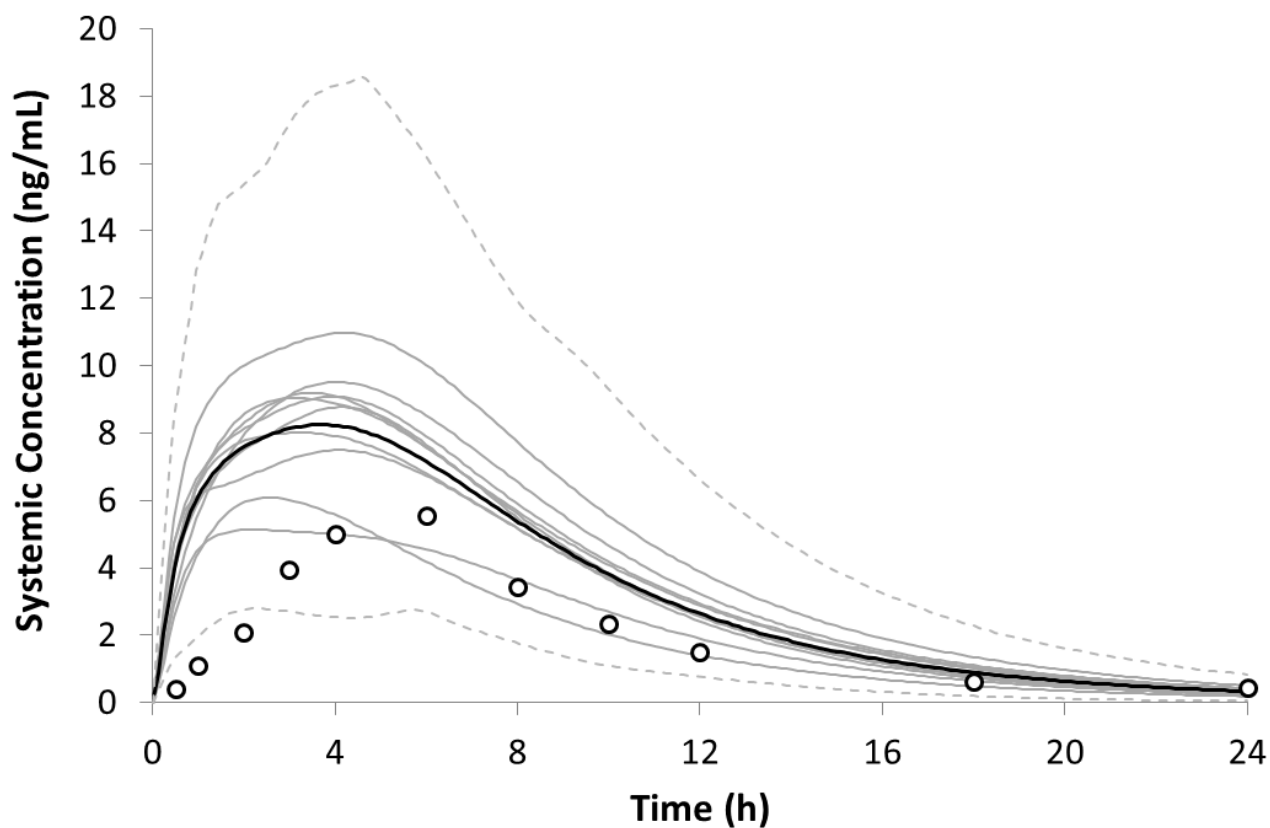

**Figure S3** – Simulated plasma concentration-time profiles of rosuvastatin in healthy volunteers following oral administration of 20 mg. The grey thin lines represent simulated individual trials (10) of 9 male subjects (31-60 years) and the solid black line represents the simulated mean of the healthy volunteers population (n=90). The dashed lines represent the upper (5<sup>th</sup>) and lower (95<sup>th</sup>) percentiles of simulated concentrations for the total population (n=90 subjects). The circles denote mean values from the clinical study by Martin *et al.* 2003a<sup>19</sup>.

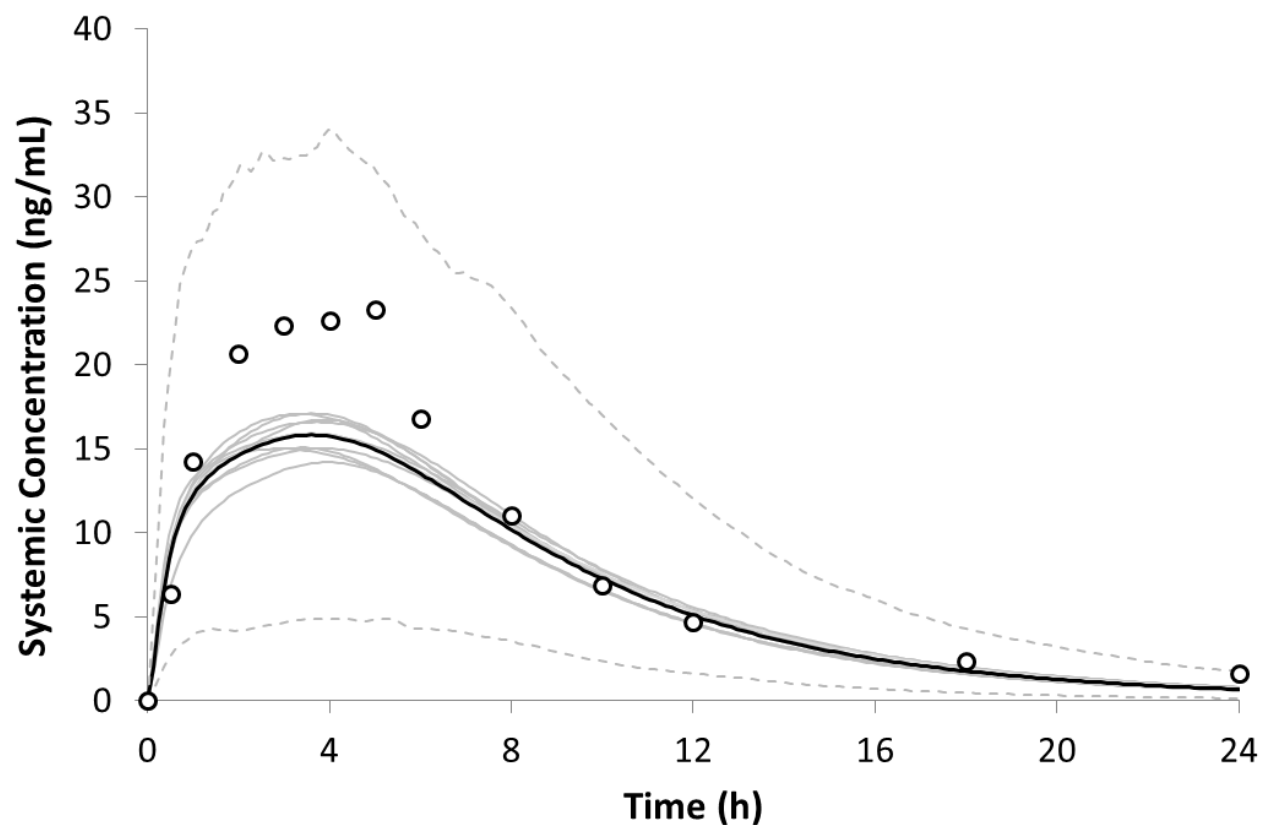

**Figure S4** – Simulated plasma concentration-time profiles of rosuvastatin in healthy volunteers following the oral administration of 40 mg. The grey thin lines represent simulated individual trials (10) of 36 subjects (13.9% female, 21-39 years) and the solid black line represents the simulated mean of the healthy volunteers population (n=360). The dashed lines represent the upper (5<sup>th</sup>) and lower (95<sup>th</sup>) percentiles of simulated concentrations for the total population (n=360 subjects). The circles denote mean values from the clinical study by Lee *et al.* 2005<sup>20</sup>.

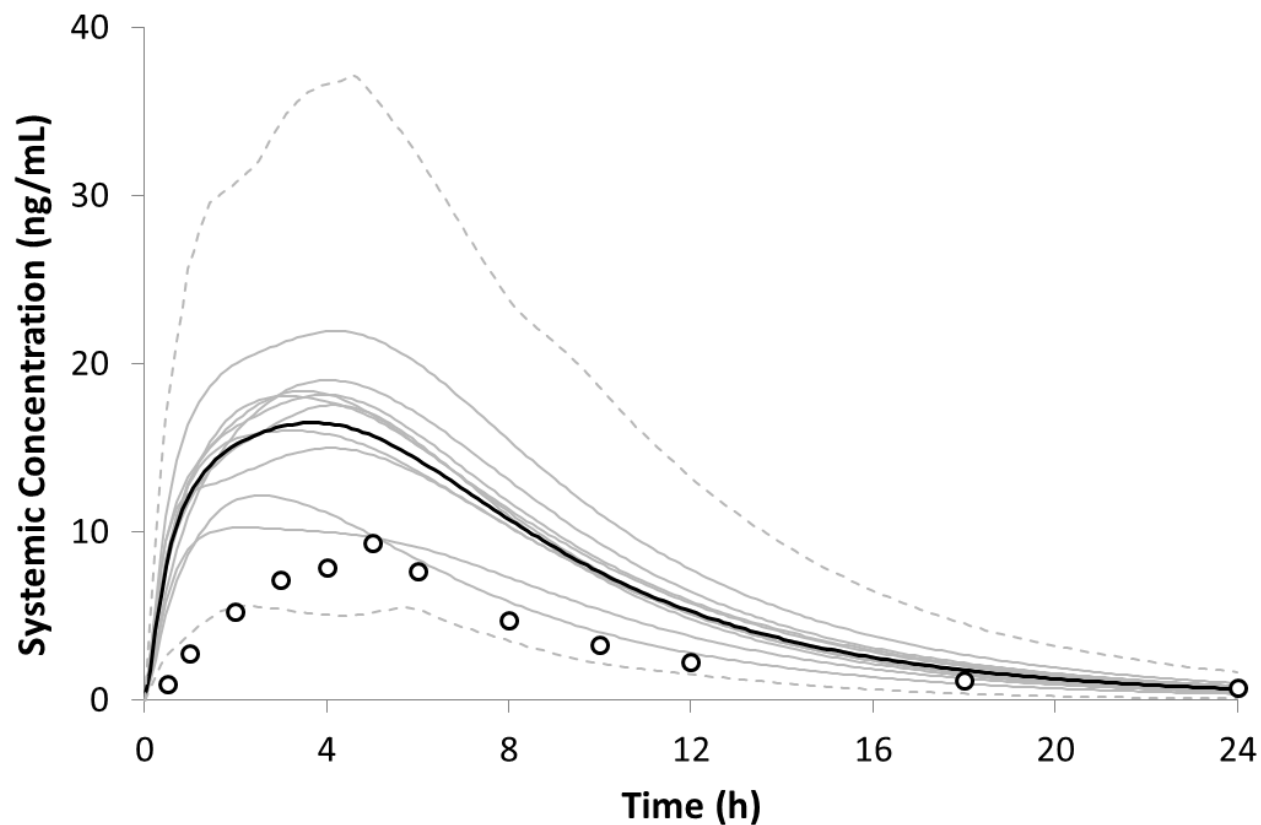

**Figure S5** – Simulated plasma concentration-time profiles of rosuvastatin in healthy volunteers following the oral administration of 40 mg. The grey thin lines represent simulated individual trials (10) of 9 male subjects (31-60 years) and the solid black line represents the simulated mean of the healthy volunteers population (n=90). The dashed lines represent the upper (5<sup>th</sup>) and lower (95<sup>th</sup>) percentiles of simulated concentrations for the total population (n=90 subjects). The circles denote mean values from the clinical study by Martin *et al.* 2003a<sup>19</sup>.

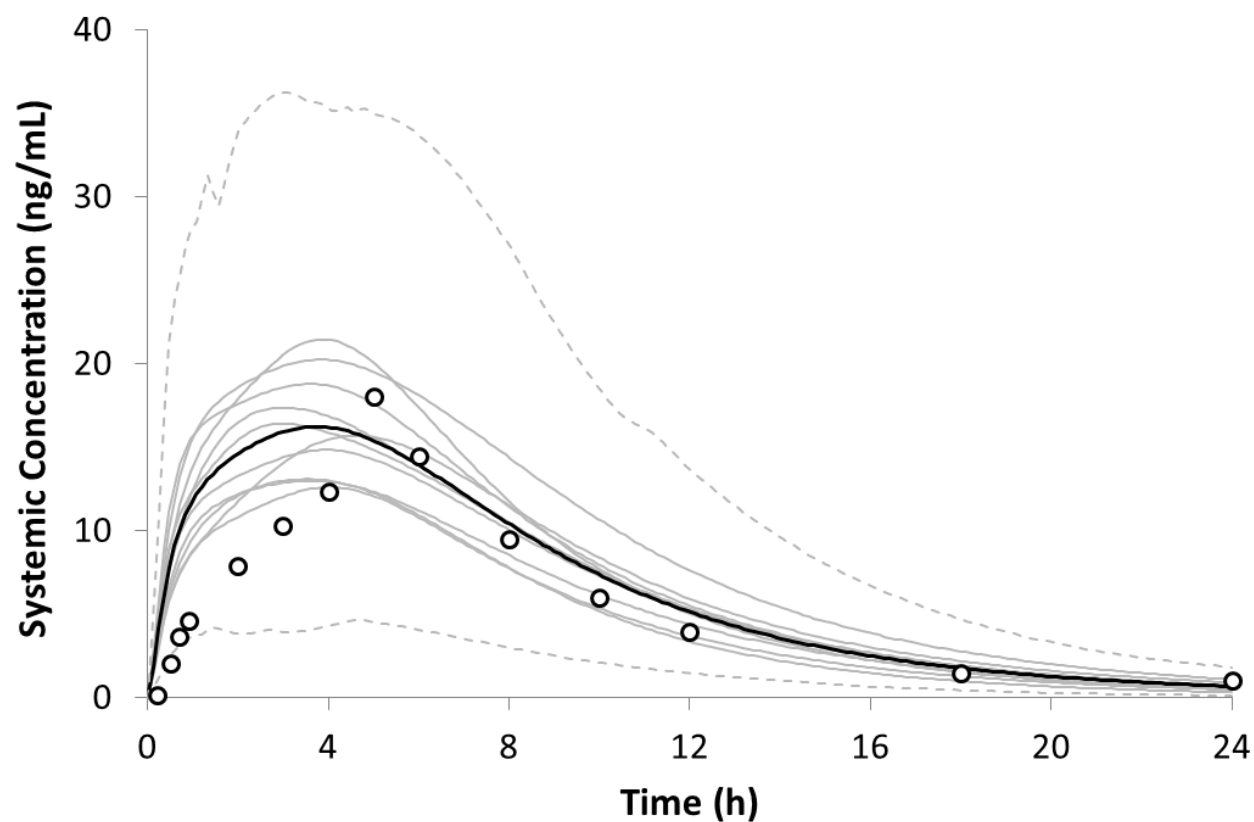

**Figure S6** – Simulated plasma concentration-time profiles of rosuvastatin in healthy volunteers following the oral administration of 40 mg. The grey thin lines represent simulated individual trials (10) of 10 male subjects (21-51 years) and the solid black line represents the simulated mean of the healthy volunteers population (n=100). The dashed lines represent the upper (5<sup>th</sup>) and lower (95<sup>th</sup>) percentiles of simulated concentrations for the total population (n=100 subjects). The circles denote mean values from the clinical study by Martin *et al.* 2003b<sup>2</sup>.

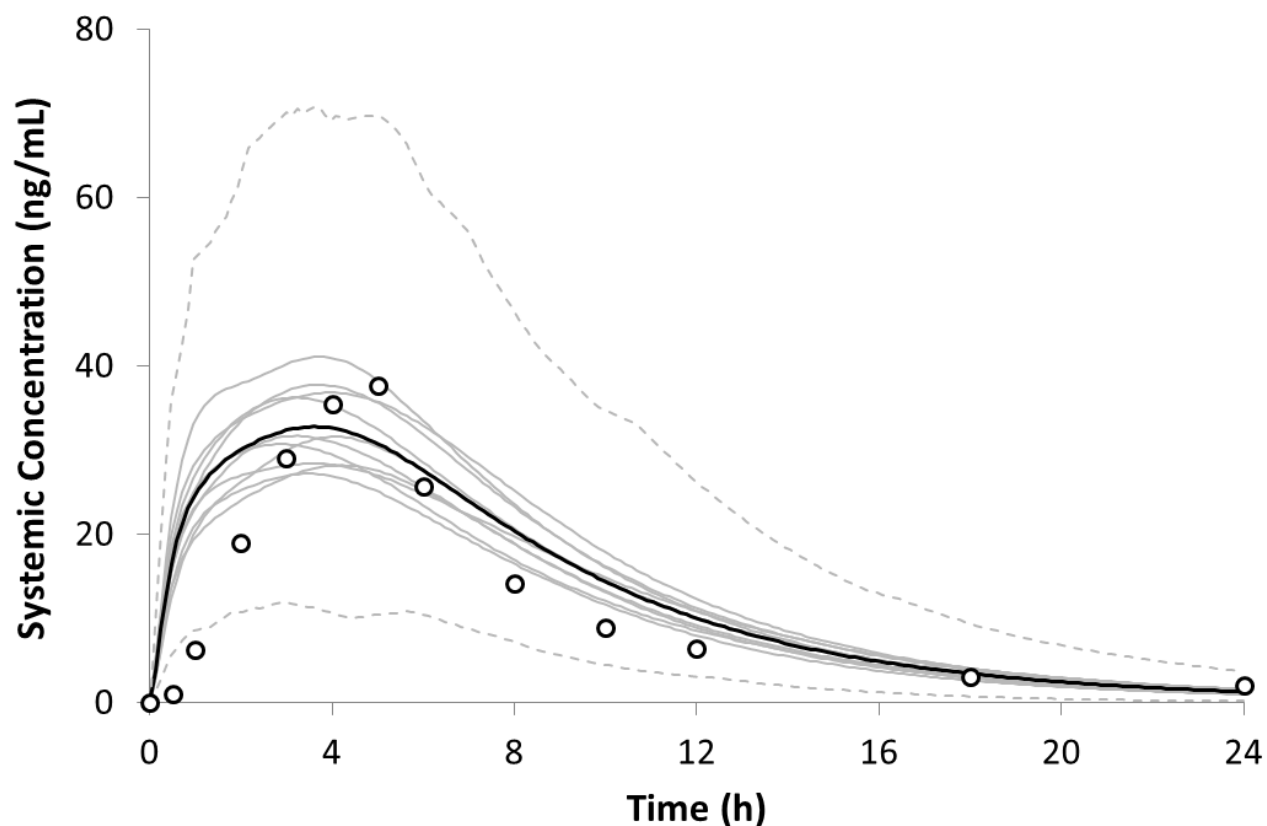

**Figure S7** – Simulated plasma concentration-time profiles of rosuvastatin in healthy volunteers following the oral administration of 80 mg. The grey thin lines represent simulated individual trials (10) of 14 male subjects (29-51 years) and the solid black line represents the simulated mean of the healthy volunteers population (n=140). The dashed lines represent the upper (5<sup>th</sup>) and lower (95<sup>th</sup>) percentiles of simulated concentrations for the total population (n=140 subjects). The circles denote mean values from the clinical study by Cooper *et al.* 2002<sup>21</sup>.

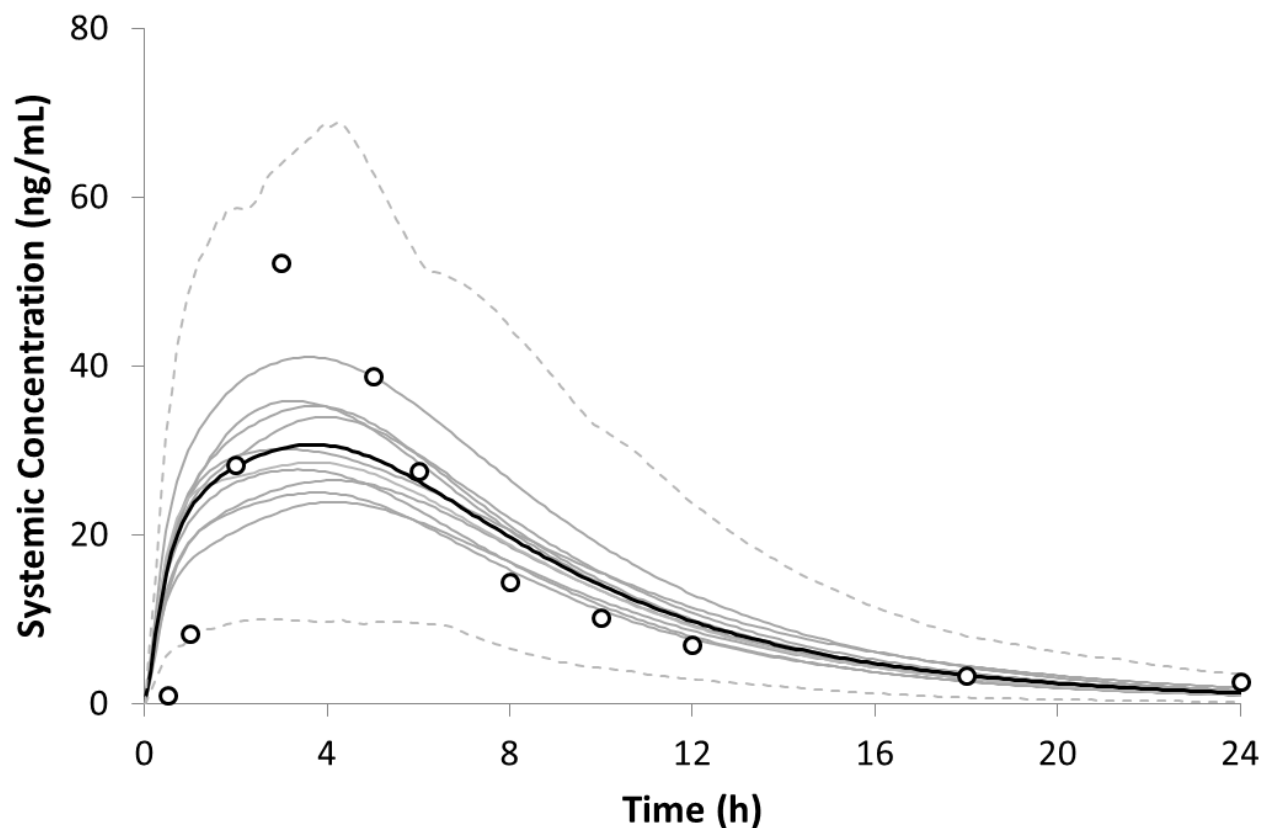

**Figure S8** – Simulated plasma concentration-time profiles of rosuvastatin in healthy volunteers following the oral administration of 80 mg. The grey thin lines represent simulated individual trials (10) of 14 male subjects (25-56 years) and the solid black line represents the simulated mean of the healthy volunteers population (n=140). The dashed lines represent the upper (5<sup>th</sup>) and lower (95<sup>th</sup>) percentiles of simulated concentrations for the total population (n=140 subjects). The circles denote mean values from the clinical study by Cooper *et al.* 2003b<sup>22</sup>.



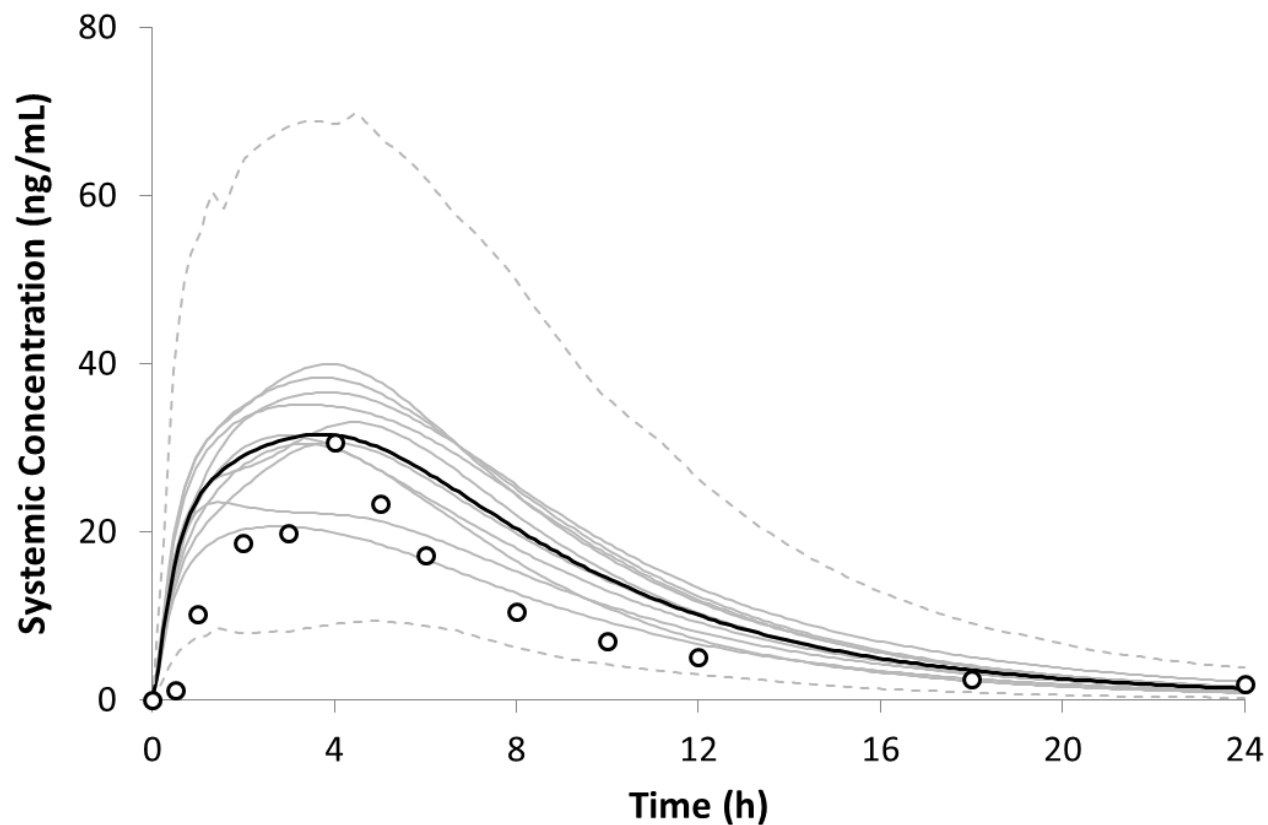

**Figure S9** – Simulated plasma concentration-time profiles of rosuvastatin in healthy volunteers following the oral administration of 80 mg. The grey thin lines represent simulated individual trials (10) of 11 male subjects (22-44 years) and the solid black line represents the simulated mean of the healthy volunteers population (n=110). The dashed lines represent the upper (5<sup>th</sup>) and lower (95<sup>th</sup>) percentiles of simulated concentrations for the total population (n=110 subjects). The circles denote mean values from the clinical study by Cooper *et al.* 2003a<sup>18</sup>.

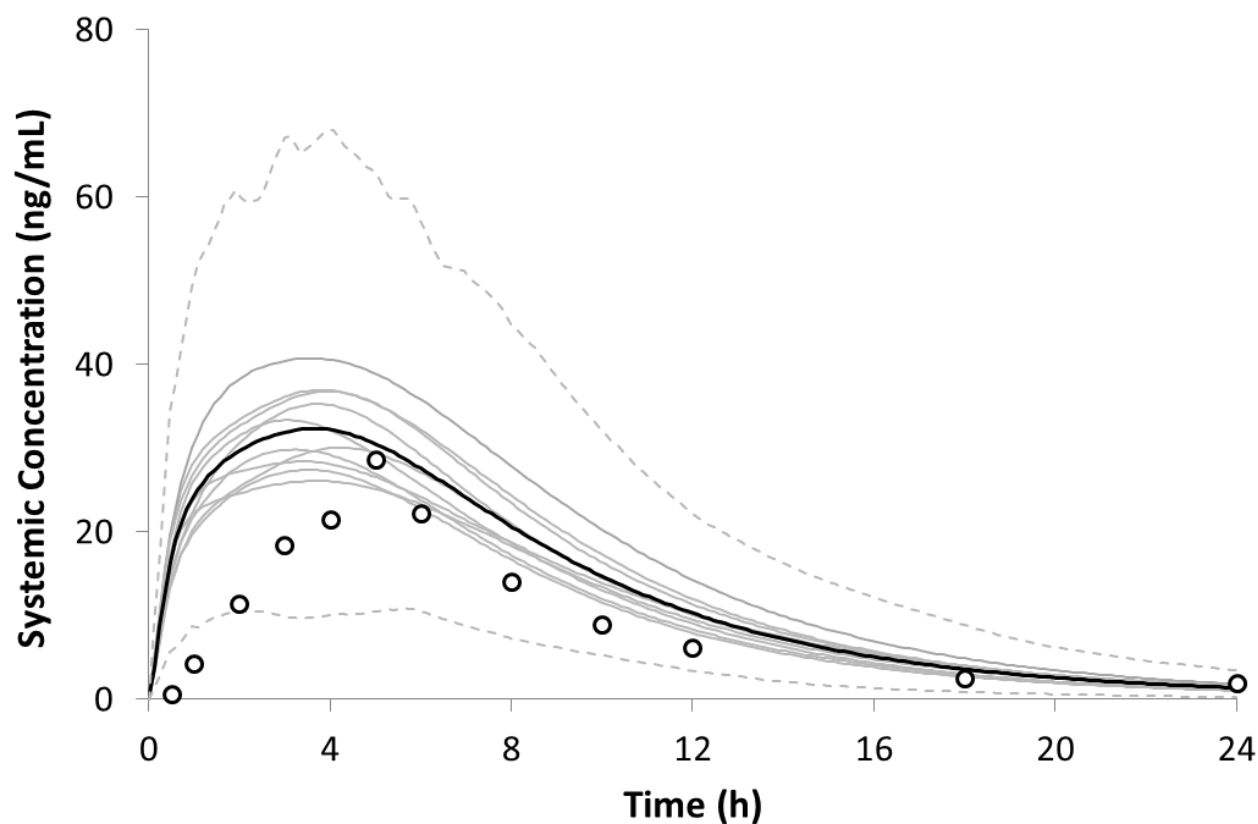

**Figure S10** – Simulated plasma concentration-time profiles of rosuvastatin in healthy volunteers following the oral administration of 80 mg. The grey thin lines represent simulated individual trials (10) of 18 male subjects (31-60 years) and the solid black line represents the simulated mean of the healthy volunteers population (n=180). The dashed lines represent the upper (5<sup>th</sup>) and lower (95<sup>th</sup>) percentiles of simulated concentrations for the total population (n=180 subjects). The circles denote mean values from the clinical study by Martin *et al.* 2003a<sup>19</sup>.

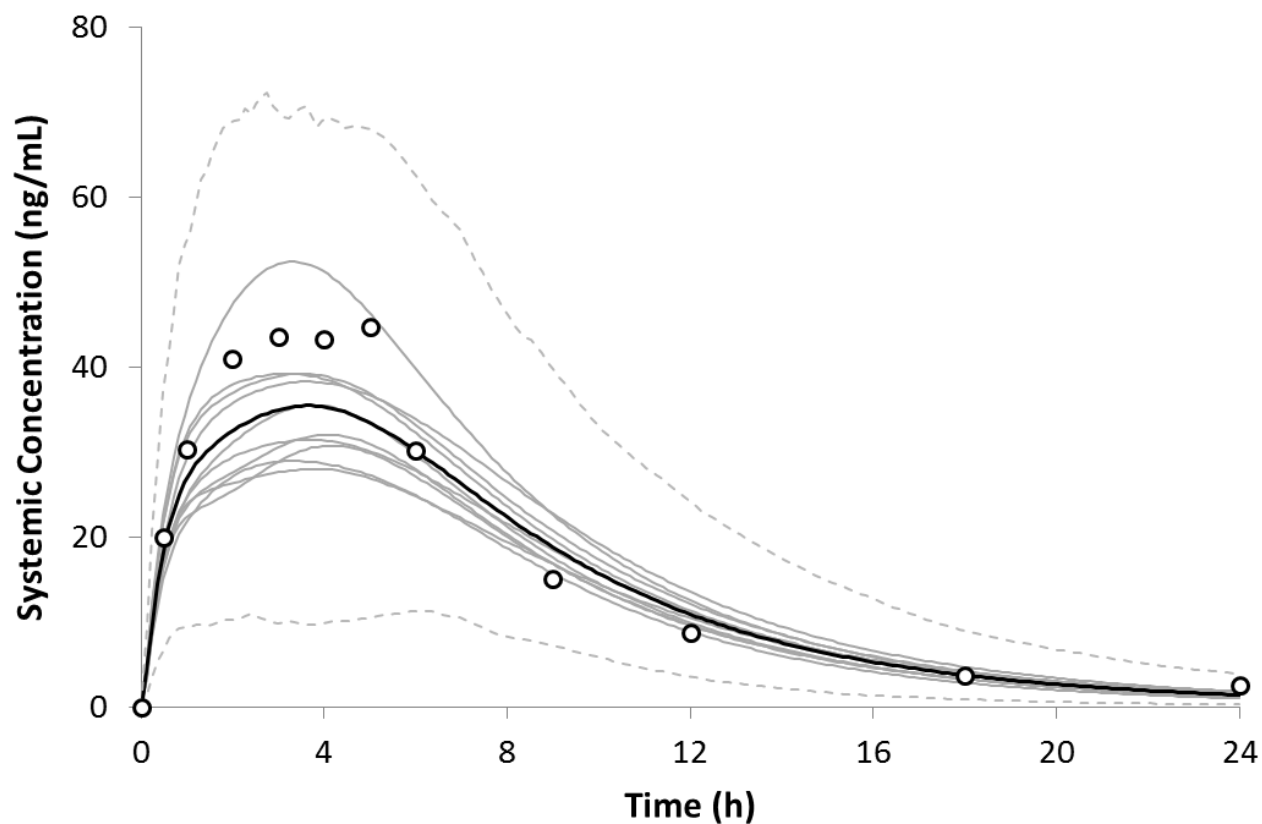

**Figure S11** – Simulated plasma concentration-time profiles of rosuvastatin in healthy volunteers following the oral administration of 80 mg. The grey thin lines represent simulated individual trials (10) of 20 subjects (0.15% female, 35-47 years) and the solid black line represents the simulated mean of the healthy volunteers population (n=200). The dashed lines represent the upper (5<sup>th</sup>) and lower (95<sup>th</sup>) percentiles of simulated concentrations for the total population (n=200 subjects). The circles denote mean values from the clinical study by Schneck *et al.* 2003<sup>8</sup>.

## References

1. Armitage P, Berry G, Matthews JNS. *Statistical Methods in Medical Research (4th Ed)*. 4th Ed. Malden; MA: Wiley; 2002.
2. Martin PD, Warwick MJ, Dane AL, Brindley C, Short T. Absolute oral bioavailability of rosuvastatin in healthy white adult male volunteers. *Clin Ther*. 2003;25(10): 2553-2563.
3. Jones HM, Barton HA, Lai Y, et al. Mechanistic pharmacokinetic modeling for the prediction of transporter-mediated disposition in humans from sandwich culture human hepatocyte data. *Drug Metab Dispos*. 2012;40(5): 1007-1017.
4. Ahmad S, Madsen CS, Stein PD, et al. (3R,5S,E)-7-(4-(4-fluorophenyl)-6-isopropyl-2-(methyl(1-methyl-1h-1,2,4-triazol-5-yl)amino)pyrimidin-5-yl)-3,5-dihydroxyhept-6-enoic acid (BMS-644950): a rationally designed orally efficacious 3-hydroxy-3-methylglutaryl coenzyme-a reductase inhibitor with reduced myotoxicity potential. *J Med Chem*. 2008;51(9): 2722-2733.
5. Avdeef A. *Absorption and Drug Development: Solubility, Permeability, and Charge State*. Malden , MA: Wiley; 2003.
6. Li J, Volpe DA, Wang Y, et al. Use of Transporter Knockdown Caco-2 Cells to Investigate the In Vitro Efflux of Statin Drugs. *Drug Metab Dispos*. 2011;39(7): 1196-1202.
7. Pasanen MK, Fredrikson H, Neuvonen PJ, Niemi M. Different effects of SLCO1B1 polymorphism on the pharmacokinetics of atorvastatin and rosuvastatin. *Clin Pharmacol Ther*. 2007;82(6): 726-733.
8. Schneck DW, Birmingham BK, Zalikowski JA, et al. The effect of gemfibrozil on the pharmacokinetics of rosuvastatin. *Clin Pharmacol Ther*. 2004;75(5): 455-463.
9. Keskitalo JE, Zolk O, Fromm MF, Kurkinen KJ, Neuvonen PJ, Niemi M. ABCG2 polymorphism markedly affects the pharmacokinetics of atorvastatin and rosuvastatin. *Clin Pharmacol Ther*. 2009;86(2): 197-203.
10. Keskitalo JE, Kurkinen KJ, Neuvonen M, Backman JT, Neuvonen PJ, Niemi M. No significant effect of ABCB1 haplotypes on the pharmacokinetics of fluvastatin, pravastatin, lovastatin, and rosuvastatin. *Br J Clin Pharmacol*. 2009;68(2): 207-213.
11. Kitamura S, Maeda K, Wang Y, Sugiyama Y. Involvement of multiple transporters in the hepatobiliary transport of rosuvastatin. *Drug Metab Dispos*. 2008;36(10): 2014-2023.
12. Ho RH, Tirona RG, Leake BF, et al. Drug and bile acid transporters in rosuvastatin hepatic uptake: function, expression, and pharmacogenetics. *Gastroenterology*. 2006;130(6): 1793-1806.
13. Abe K, Bridges AS, Brouwer KLR. Use of sandwich-cultured human hepatocytes to predict biliary clearance of angiotensin II receptor blockers and HMG-CoA reductase inhibitors. *Drug Metab Dispos*. 2009;37(3): 447-452.
14. Bergman E, Forsell P, Tevell A, et al. Biliary secretion of rosuvastatin and bile acids in humans during the absorption phase. *Eur J Pharm Sci*. 2006;29(3-4): 205-214.
15. Bergman E, Matsson EM, Hedeland M, Bondesson U, Knutson L, Lennernäs H. Effect of a single gemfibrozil dose on the pharmacokinetics of rosuvastatin in bile and plasma in healthy volunteers. *J Clin Pharmacol*. 2010;50(9): 1039-1049.
16. Kotani N, Maeda K, Watanabe T, et al. Culture period-dependent changes in the uptake of transporter substrates in sandwich-cultured rat and human hepatocytes. *Drug Metab Dispos*. 2011;39(9): 1503-1510.
17. Neuhoff S, Lu G, Burt H, et al. Accounting for Transporters in Renal Clearance: Towards a Mechanistic Kidney Model (Mech KiM). *Transporters in Drug Development: Discovery, Optimization, Clinical Study*: Springer Science & Business Media; 2013:155-177.

18. Cooper KJ, Martin PD, Dane AL, Warwick MJ, Schneck DW, Cantarini MV. Effect of itraconazole on the pharmacokinetics of rosuvastatin. *Clin Pharmacol Ther.* 2003;73(4): 322-329.
19. Martin PD, Warwick MJ, Dane AL, Cantarini MV. A double-blind, randomized, incomplete crossover trial to assess the dose proportionality of rosuvastatin in healthy volunteers. *Clin Ther.* 2003;25(8): 2215-2224.
20. Lee E, Ryan S, Birmingham B, et al. Rosuvastatin pharmacokinetics and pharmacogenetics in white and Asian subjects residing in the same environment. *Clin Pharmacol Ther.* 2005;78(4): 330-341.
21. Cooper KJ, Martin PD, Dane AL, Warwick MJ, Schneck DW, Cantarini MV. The effect of fluconazole on the pharmacokinetics of rosuvastatin. *Eur J Clin Pharmacol.* 2002;58(8): 527-531.
22. Cooper KJ, Martin PD, Dane AL, Warwick MJ, Raza A, Schneck DW. The effect of erythromycin on the pharmacokinetics of rosuvastatin. *Eur J Clin Pharmacol.* 2003;59(1): 51-56.
